# Supplementary material
Source: publisher figshare collection journal article supplement (https://asha.figshare.com/ndownloader/files/33891626)
Supplement: Supplementary file 1 [file 33891626]

## Appendix A

### Word Stimuli

| Set A        |                  |                    | Set B        |                  |                    |
|--------------|------------------|--------------------|--------------|------------------|--------------------|
| English Word | Trained Neighbor | Untrained Neighbor | English Word | Trained Neighbor | Untrained Neighbor |
| army         | ˈarmou           | ˈarmuʊ             | basket       | ˈbæskəl          | ˈbæskəm            |
| bucket       | ˈbʌkɪdʒ          | ˈbʌkəv             | butter       | ˈbʌtəp           | ˈbʌtəg             |
| finger       | ˈfɪŋgəp          | ˈfɪŋgəs            | captain      | ˈkæptɪdʒ         | ˈkæptɪk            |
| garage       | ˈgærək           | ˈgærəm             | pumpkin      | ˈpʌmpkət         | ˈpʌmpkəs           |
| honey        | ˈhʌnə            | ˈhʌnou             | music        | ˈmjuzɪb          | ˈmjuzən            |
| cabin        | ˈkæbrɪb          | ˈkæbrɪf            | ocean        | ˈouʃək           | ˈouʃəl             |
| winter       | ˈwɪntəg          | ˈwɪntən            | oven         | ˈʌvəd            | ˈʌvək              |
| closet       | ˈklɒzəm          | ˈklɒzəg            | pocket       | ˈpɒkəm           | ˈpɒkər             |
| office       | ˈɒfɪd            | ˈɒfɪk              | partidge     | ˈpɑrtɪp          | ˈpɑtrəm            |
| lettuce      | ˈletəv           | ˈletəl             | kitchen      | ˈkɪtʃət          | ˈkɪtʃəf            |
| machine      | məʃɪg            | məʃɪz              | river        | ˈrɪvəd           | ˈrɪvəs             |
| movie        | ˈmuvu            | ˈmuvou             | stomach      | ˈstʌməs          | ˈstʌməb            |
| lady         | ˈleɪdə           | ˈleɪdaɪ            | ticket       | ˈtɪkəm           | ˈtɪkəf             |
| pillow       | ˈpɪlu            | ˈpɪli              | tennis       | ˈtɛnɪb           | ˈtɛnɪtʃ            |
| puzzle       | ˈpʌzəm           | ˈpʌzəv             | cartoon      | ˈkɑrtuk          | ˈkɑrtus            |
| city         | ˈsɪtuʊ           | ˈsɪtə              | woman        | ˈwʊməl           | ˈwʊmət             |

## Appendix B

### Referent Stimuli and Training Script

| Set A<br>English Word | Target Semantic<br>Neighbor                                                         | Untrained Semantic Neighbor<br>(Foil)                                                | Training Script                                                                            |
|-----------------------|-------------------------------------------------------------------------------------|--------------------------------------------------------------------------------------|--------------------------------------------------------------------------------------------|
| pony                  |    |     | <b>Armo</b><br>An armo is a type of<br>pony.<br>The armo ate hay.                          |
| turtle                |    |     | <b>Buckedge</b><br>A buckedge is a type<br>of turtle.<br>The buckedge moved<br>slowly.     |
| sheriff               |    |     | <b>Fingep</b><br>A fingep is a type of<br>sheriff.<br>The fingep arrested<br>the criminal. |
| phone                 |   |    | <b>Garak</b><br>A garak is a type of<br>phone.<br>The garak rang<br>incessantly.           |
| penguin               |  |   | <b>Huna</b><br>A huna is a type of<br>penguin.<br>The huna swam in the<br>icy water.       |
| chicken               |  |   | <b>Kabib</b><br>A kabib is a type of<br>chicken.<br>The kabib ran from the<br>farmer.      |
| angel                 |  |  | <b>Winteg</b><br>A winteg is a type of<br>angel.<br>The winteg flew<br>through the clouds. |

| wagon        | 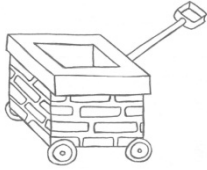   |    | <p><b>Klazem</b><br/>A klazem is a type of wagon.<br/>The klazem was hard to pull.</p>       |
|--------------|-------------------------------------------------------------------------------------|--------------------------------------------------------------------------------------|----------------------------------------------------------------------------------------------|
| English Word | Target Semantic Neighbor                                                            | Untrained Semantic Neighbor (Foil)                                                   | Training Script                                                                              |
| ladder       |    |     | <p><b>Ofid</b><br/>An ofid is a type of ladder.<br/>The ofid was dangerous to climb.</p>     |
| banana       |    |    | <p><b>Letev</b><br/>A letev is a type of banana.<br/>The letev was not yet ripe.</p>         |
| planet       |   |    | <p><b>Mashig</b><br/>A mashig is a type of planet.<br/>The mashig was invaded by aliens.</p> |
| robot        |  |   | <p><b>Muvu</b><br/>A muvu is a type of robot.<br/>The muvu was state-of-the-art.</p>         |
| bicycle      |  |  | <p><b>Leida</b><br/>A leida is a type of bicycle.<br/>The leida had ten speeds.</p>          |
| castle       |  |  | <p><b>Pilu</b><br/>A pilu is a type of castle.<br/>The pilu was drafty in the winter.</p>    |
| clown        |  |   | <p><b>Puzum</b><br/>A puzum is a type of clown.<br/>The puzum was a bit freaky.</p>          |

| elephant              |    |   | <b>Sito</b><br>A sito is a type of elephant.<br>The sito charged the jeep.          |
|-----------------------|-------------------------------------------------------------------------------------|-------------------------------------------------------------------------------------|-------------------------------------------------------------------------------------|
| <hr/>                 |                                                                                     |                                                                                     |                                                                                     |
| Set B<br>English Word | Target Semantic Neighbor                                                            | Untrained Semantic Neighbor (Foil)                                                  | Training Script                                                                     |
| dragon                |    |    | <b>Baskel</b><br>A baskel is a type of dragon.<br>The baskel frightened the prince. |
| cookie                |    |    | <b>Buttep</b><br>A buttep is a type of cookie.<br>The buttep was homemade.          |
| monkey                |   |   | <b>Kaptidge</b><br>A kaptidge is a type of monkey.<br>The kaptidge climbed a tree.  |
| cat                   |  |  | <b>Pumpkit</b><br>A pumpkit is a type of cat.<br>The pumpkit purred loudly.         |
| baby                  |  |  | <b>Musib</b><br>A musib is a type of baby.<br>The musib napped every afternoon.     |
| dog                   |  |  | <b>Oshik</b><br>An oshik is a type of dog.<br>The oshik barked at the moon.         |

---

rabbit

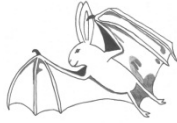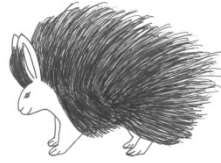

**Oved**

An oved is a type of  
rabbit.  
The oved hopped through  
the garden.

spider

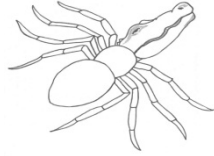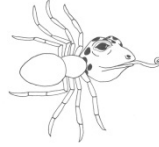

**Pockem**

A pockem is a type of  
spider.  
The pockem gave the girl  
the creeps.

---

| English Word | Target Semantic Neighbor                                                            | Untrained Semantic Neighbor (Foil)                                                   | Training Script                                                                                                       |
|--------------|-------------------------------------------------------------------------------------|--------------------------------------------------------------------------------------|-----------------------------------------------------------------------------------------------------------------------|
| monster      |    |    | <p><b>Partrip</b></p> <p>A partrip is a type of monster.</p> <p>The partrip was kinder than he looked.</p>            |
| pizza        |    |    | <p><b>Kitchet</b></p> <p>A kitchet is a type of pizza.</p> <p>The kitchet is a date-night favorite.</p>               |
| paddle       |    |    | <p><b>Rived</b></p> <p>A rived is a type of paddle.</p> <p>The rived fell off the canoe.</p>                          |
| carrot       |    |    | <p><b>Stomas</b></p> <p>A stomas is a type of carrot.</p> <p>The stomas was not ripe enough to eat.</p>               |
| rocket       |   |    | <p><b>Tickem</b></p> <p>A tickem is a type of rocket.</p> <p>The tickem left for outer space.</p>                     |
| flower       |  |   | <p><b>Tennib</b></p> <p>A tennib is a type of flower.</p> <p>The tennib blooms only in the early spring.</p>          |
| ambulance    |  |  | <p><b>Cartook</b></p> <p>A cartook is a type of ambulance.</p> <p>The cartook transported the patient.</p>            |
| hammer       |  |  | <p><b>Womal</b></p> <p>A womal is a type of hammer.</p> <p>The womal was the wrong size for the carpenter's hand.</p> |
